# Supplementary material
Source: bioRxiv or medRxiv preprint supplement (https://www.biorxiv.org/highwire/filestream/6027/field_highwire_adjunct_files/6/022889-3.pdf)

Divergence Time  
{40,000:70,000}

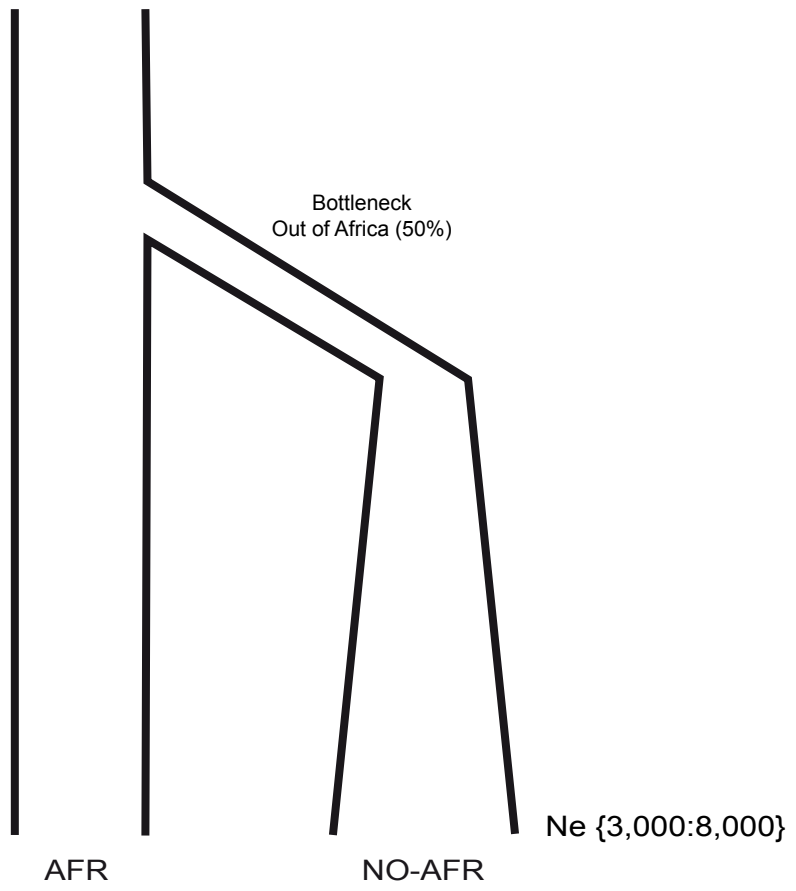

Supplement: Supplementary file [file 022889-3.pdf]
